# Supplementary material for: The Forward Effect of Delayed Judgments of Learning Is Influenced by Difficulty in Memory and Category Learning
Source: MDPI journal article supplement (doi:10.3390/jintelligence11060101), 2023-05-25

## Supplemental Information

Table S1

*Word pairs used in the experiment 1A*

| list1                    | list2  | list3  |
|--------------------------|--------|--------|
| <b>Formal experiment</b> |        |        |
| 电影——公斤                   | 钥匙——瀑布 | 泥浆——编辑 |
| 生日——篱笆                   | 孔雀——档案 | 态度——石油 |
| 自然——公安                   | 协会——速度 | 蜻蜓——皮球 |
| 显示——战争                   | 海峡——扇子 | 机会——卫生 |
| 轨道——透镜                   | 字典——日光 | 电灯——手绢 |
| 杯垫——火车                   | 说明——小时 | 整体——学者 |
| 论文——季风                   | 礼物——高楼 | 金子——树林 |
| 瓶口——蝴蝶                   | 城镇——立场 | 运动——主管 |
| 飞鸟——篮子                   | 风险——形象 | 马桶——窗户 |
| 外衣——画家                   | 武器——消息 | 萝卜——肚皮 |
| 货币——文章                   | 集中——散步 | 水池——大米 |
| 玉米——高山                   | 权力——效果 | 水壶——饭盒 |
| <b>Practice block</b>    |        |        |
| 人物——方法                   | 工人——现实 | 积雪——农历 |
| 烟囱——篱笆                   | 区域——规律 | 路线——医院 |

Table S2

*Word pairs used in the experiment 1B*

| list1                    | list2  | list3  |
|--------------------------|--------|--------|
| <b>Formal experiment</b> |        |        |
| <b>Easy</b>              |        |        |
| 保健——卫生                   | 公里——长度 | 案件——犯罪 |
| 珍珠——贝壳                   | 机械——零件 | 交易——股票 |
| 司机——汽车                   | 信件——邮票 | 意志——品质 |
| 店员——服务                   | 报刊——杂志 | 衬衣——领带 |
| 人生——命运                   | 大意——疏忽 | 公式——方程 |
| 挖掘——潜力                   | 旅客——列车 | 火海——燃烧 |
| <b>Difficult</b>         |        |        |
| 树干——手表                   | 轮船——大肠 | 翅膀——苹果 |
| 石板——眼皮                   | 客车——榕树 | 松鼠——钉子 |
| 鼠标——火柴                   | 儿童——化石 | 灯笼——水库 |
| 礼堂——山峰                   | 台阶——蜻蜓 | 肩膀——茶馆 |
| 孔雀——宝剑                   | 河流——牙齿 | 报社——板凳 |

|                       |        |        |
|-----------------------|--------|--------|
| 电视——葫芦                | 木棍——烟斗 | 刀片——窗户 |
| <b>Practice block</b> |        |        |
| Easy                  |        |        |
| 彩虹——祥云                | 眼泪——情绪 | 羽毛——企鹅 |
| Difficult             |        |        |
| 银行——轮船                | 气球——桥梁 | 岩石——器官 |

Figure S1

*The category learning materials used in Experiment 2*

List1

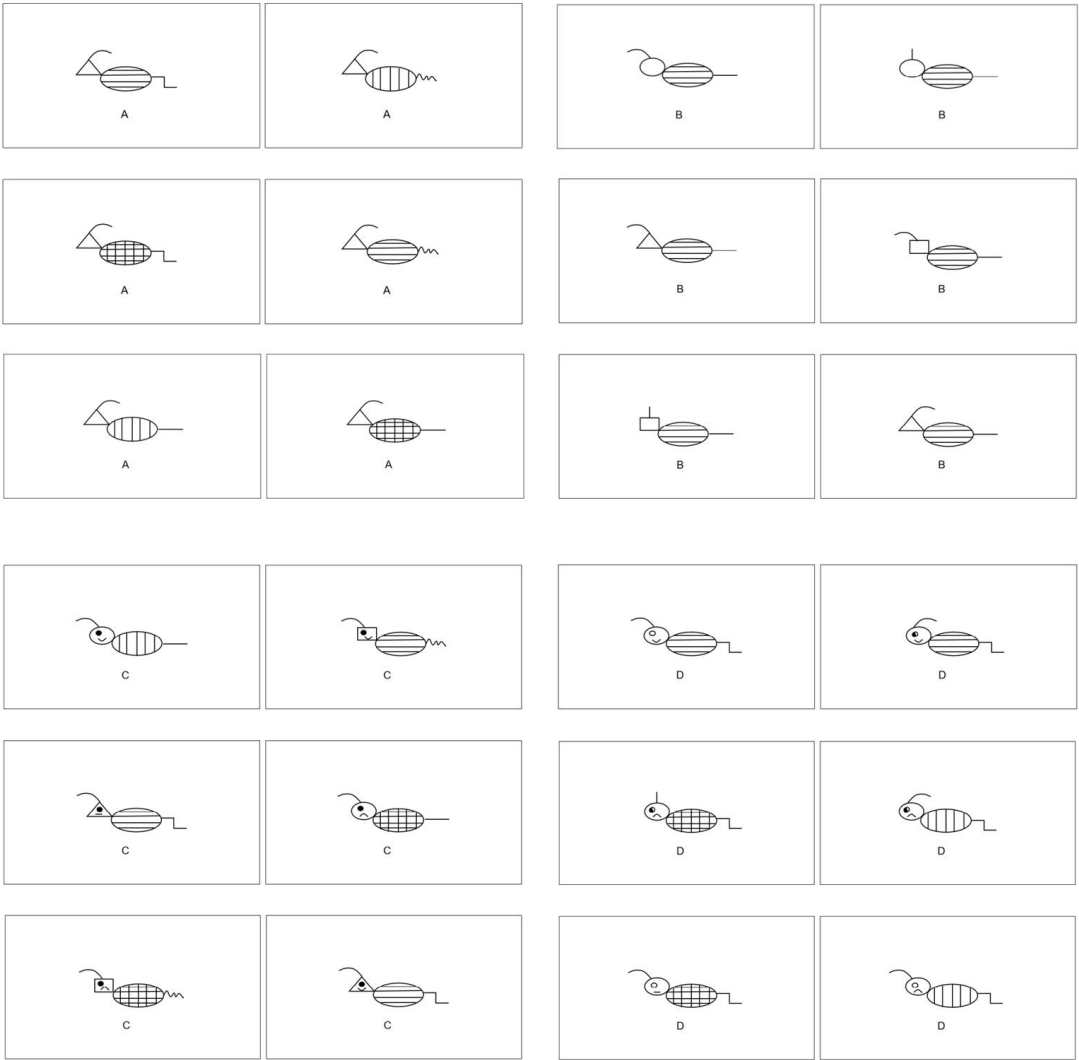

List2

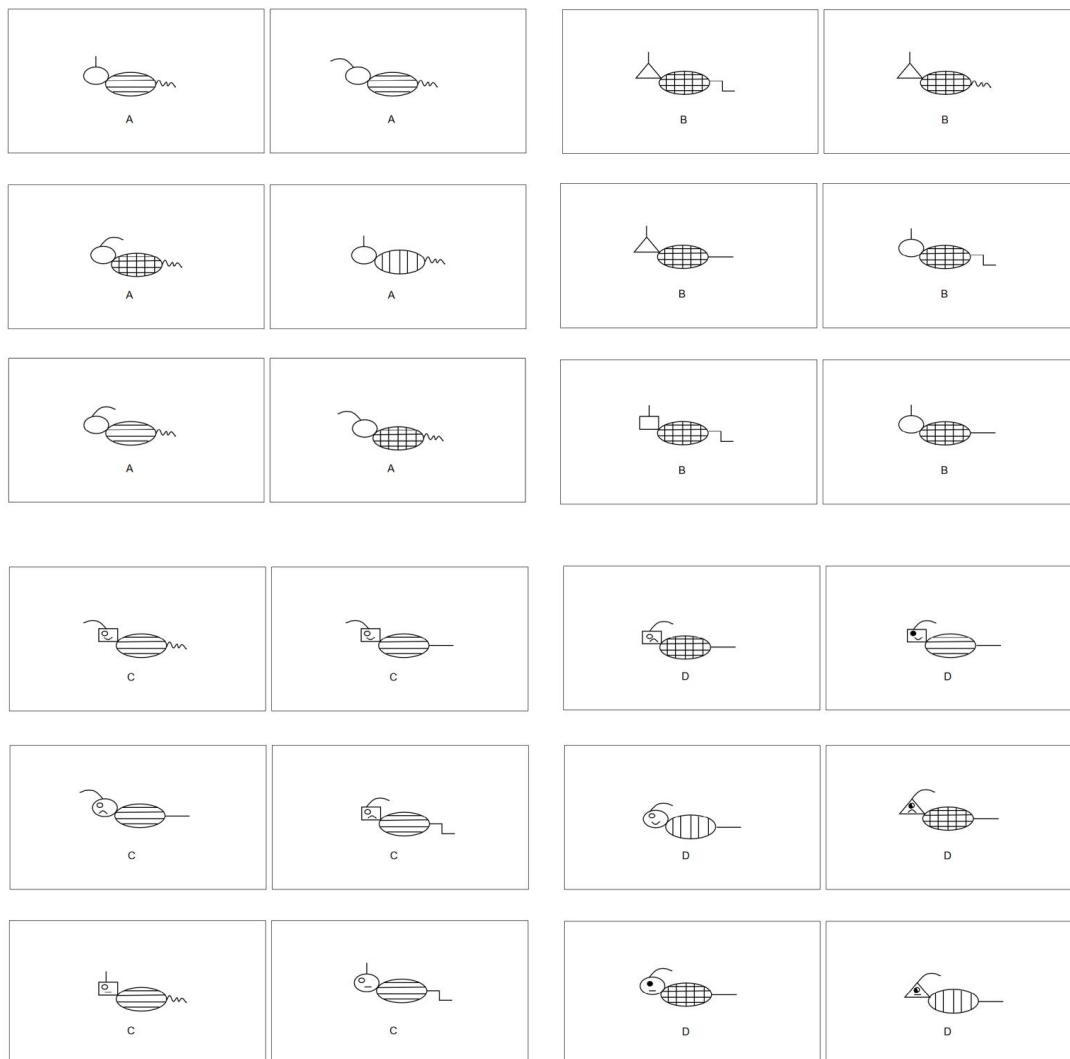

### List3

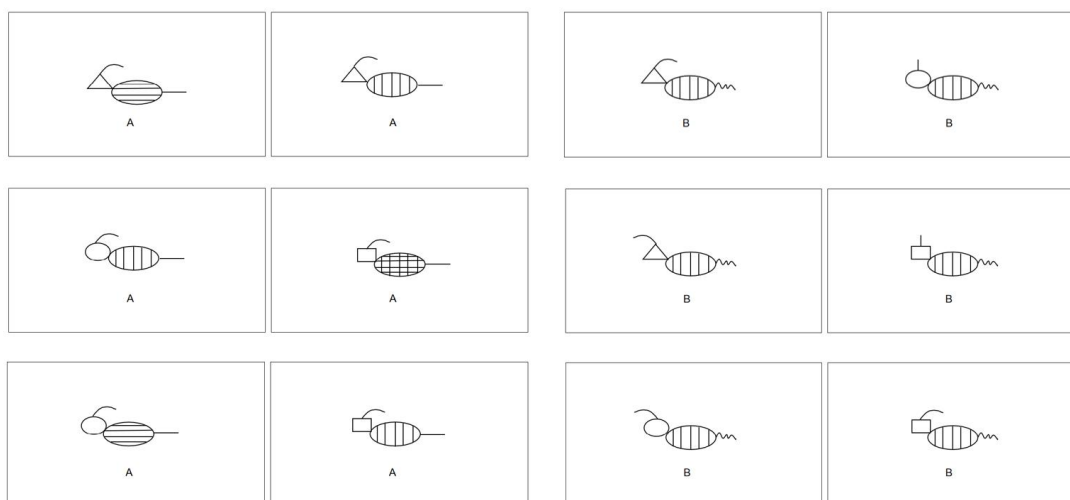

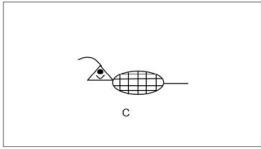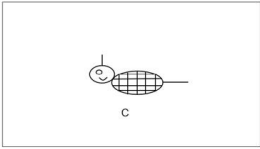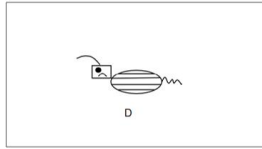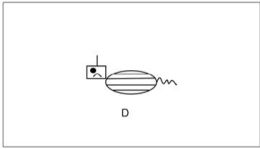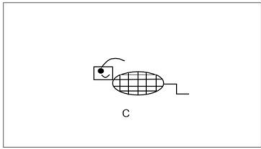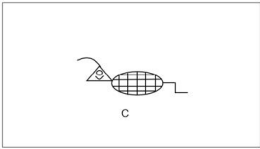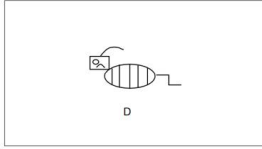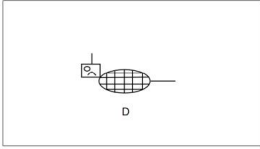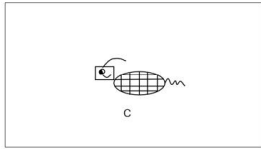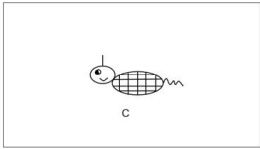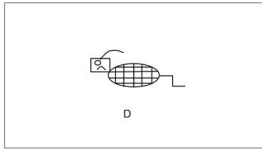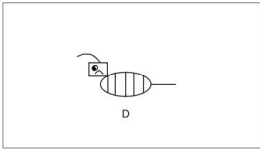

Supplement: s1 [file s1]
